# Supplementary material for: Single-Cell and Bulk RNASeq Profiling of COVID-19 Patients Reveal Immune and Inflammatory Mechanisms of Infection-Induced Organ Damage
Source: MDPI journal article supplement (doi:10.3390/v13122418), 2021-12-02
Supplement: s1 [file s1]

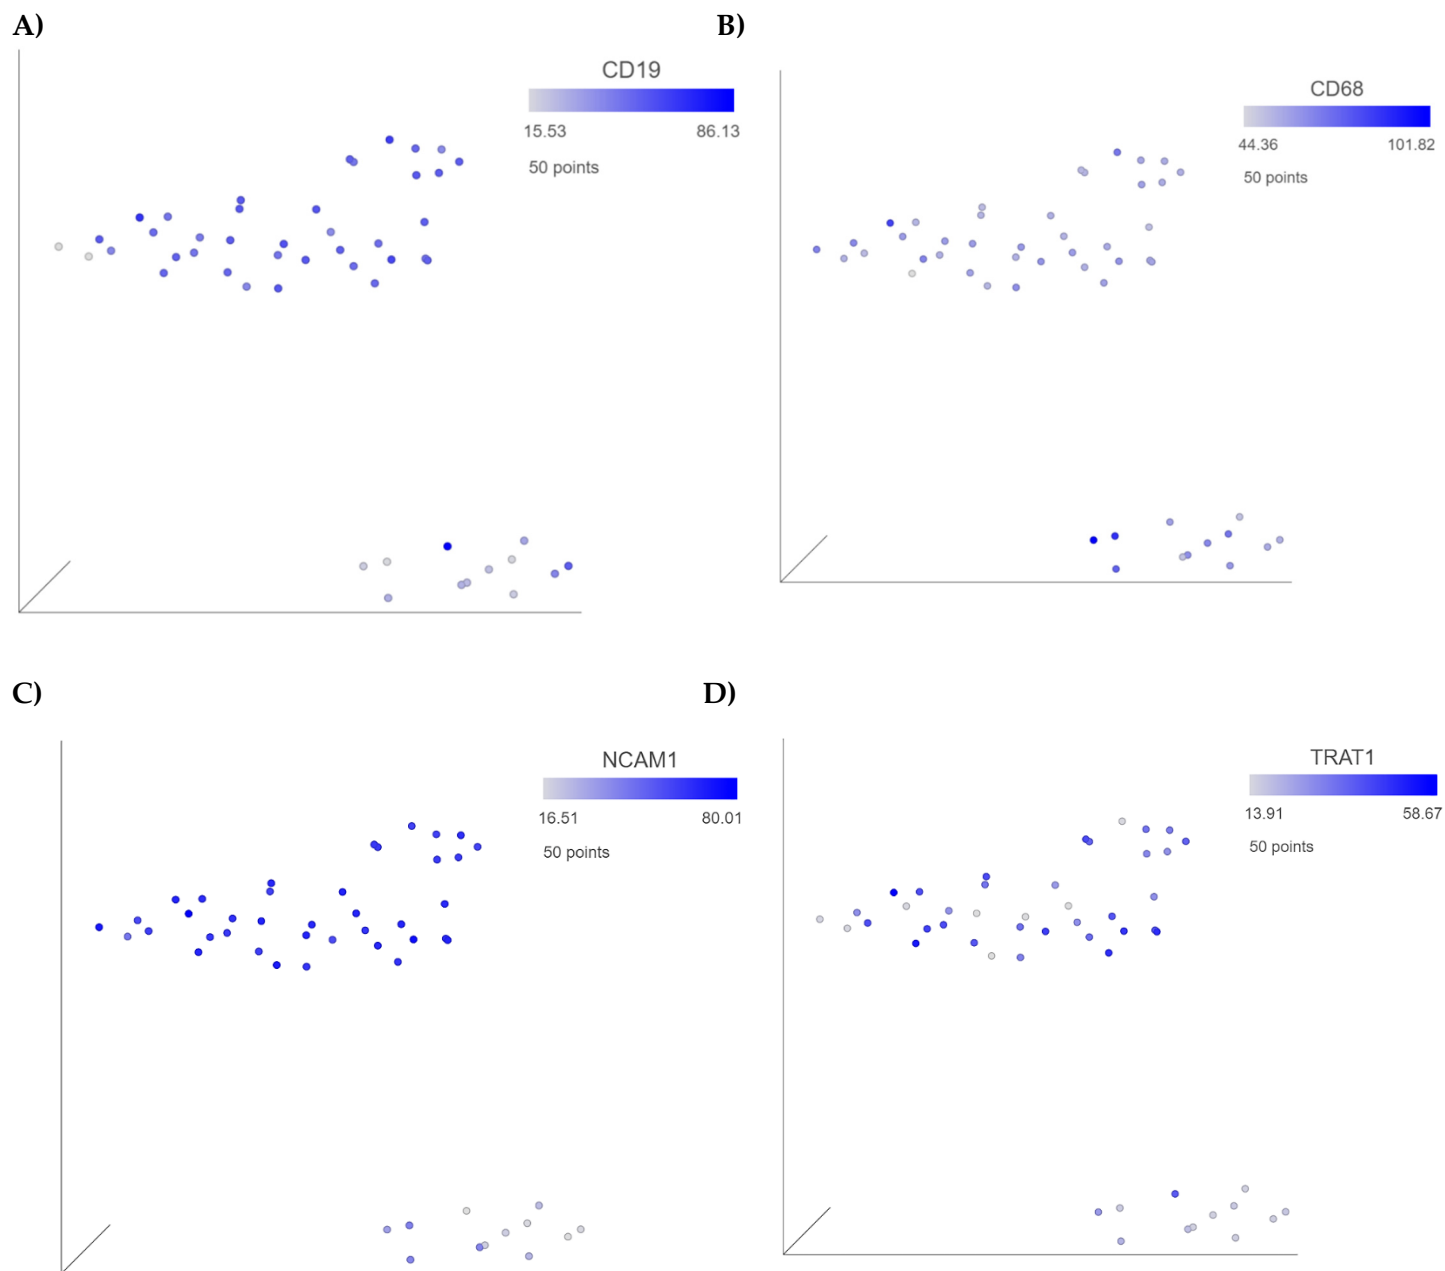

**Figure S1.** (A,B) B cell and macrophage expression in patients from dataset GSE162835. (C,D) Natural killer cell and T cell expression in patients from dataset GSE162835.

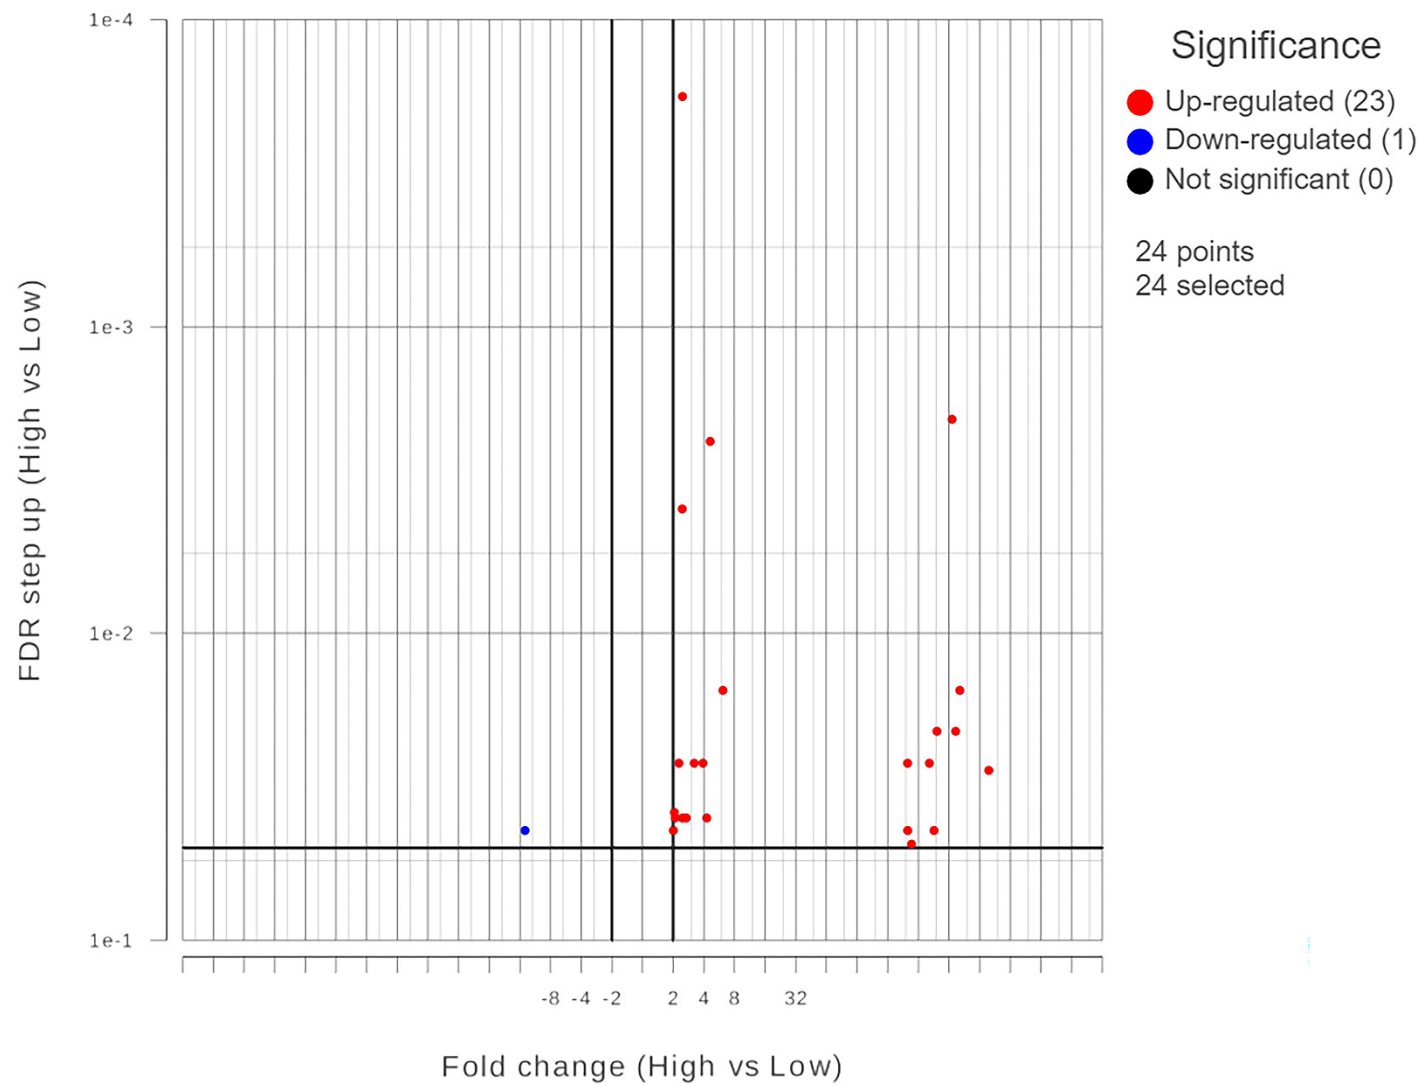

**Figure S2.** GSE150316 Volcano Plot of High versus Low Viral Load. Red dots are upregulated genes and blue dots are downregulated genes.

**A)**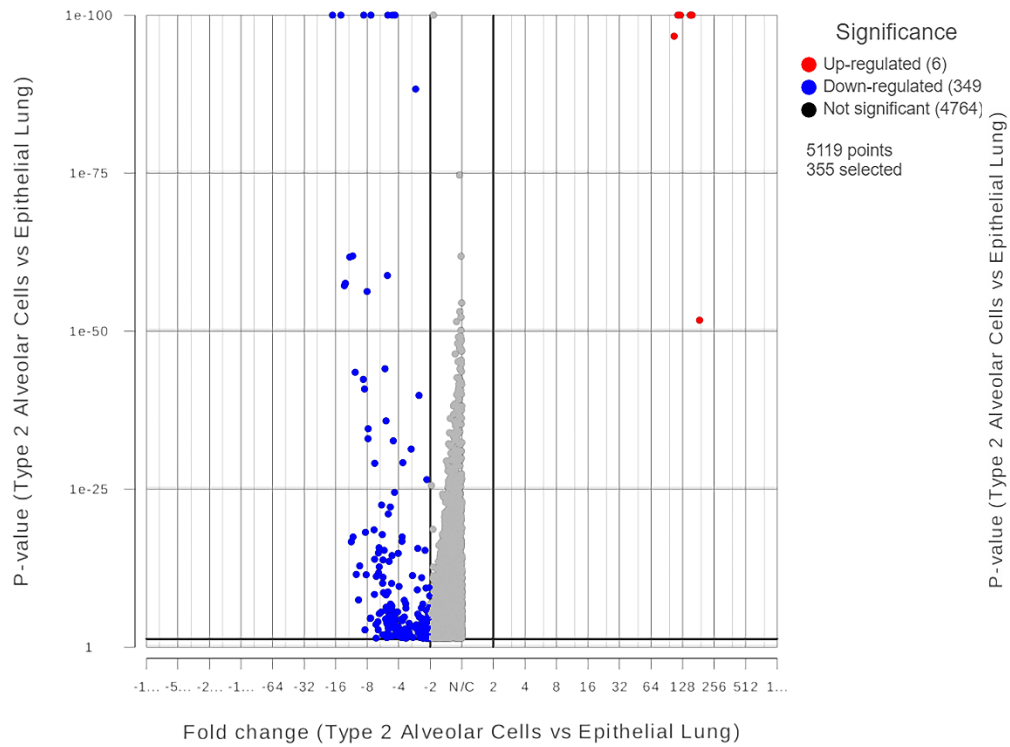**B)**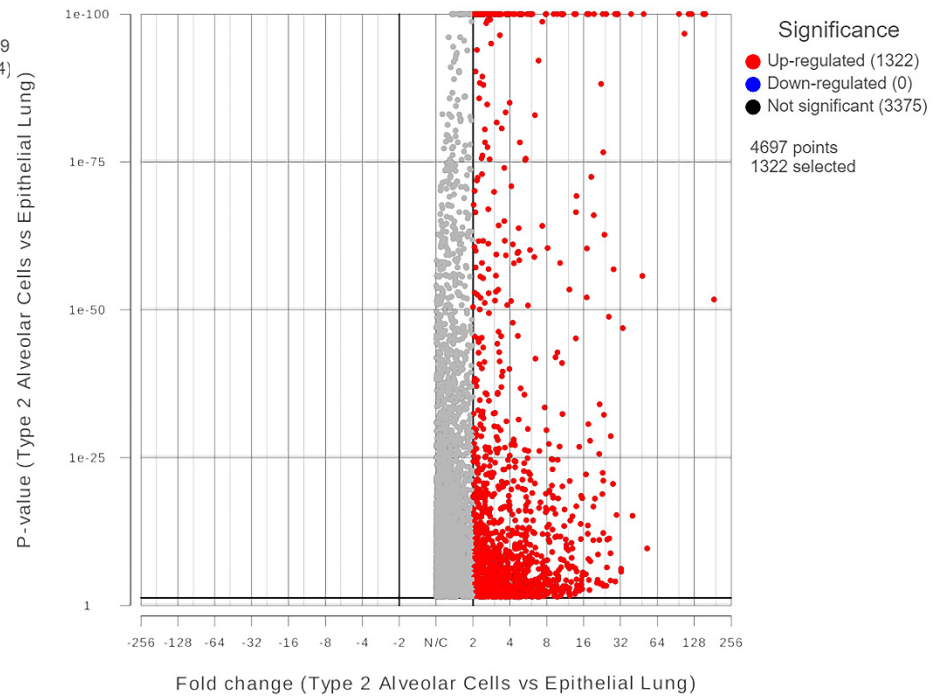

**Figure S3. (A,B)** GSE168215 Volcano Plots of AT2 Cells versus General Lung Epithelia. Red dots are upregulated genes and blue dots are downregulated genes.

**A)**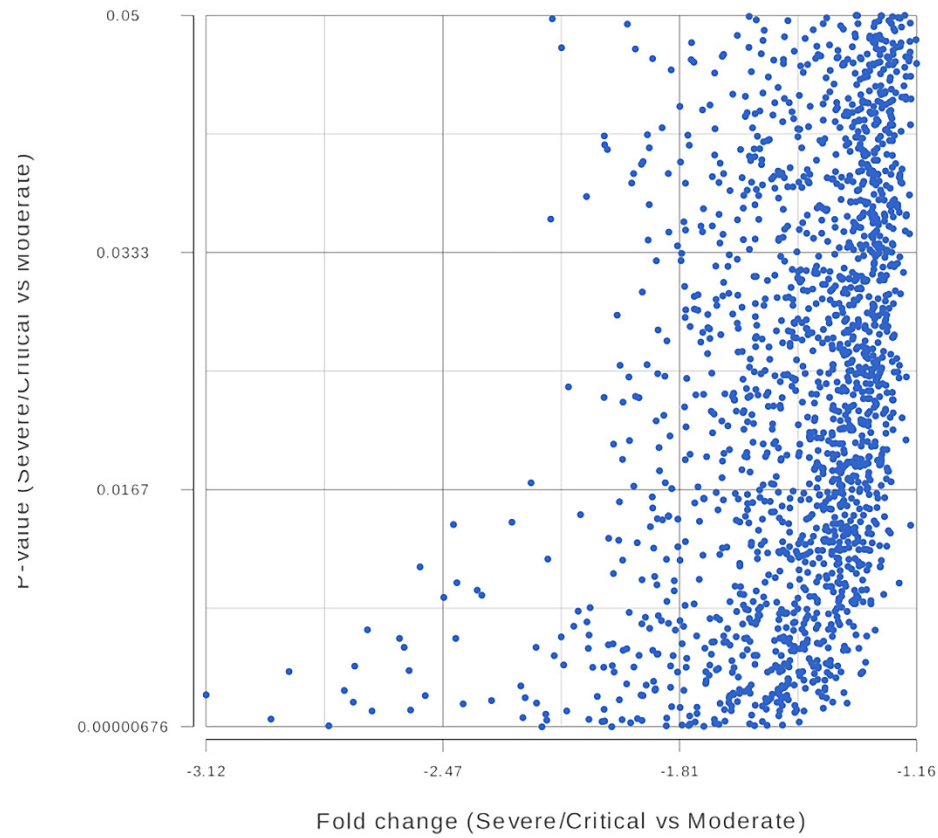**B)**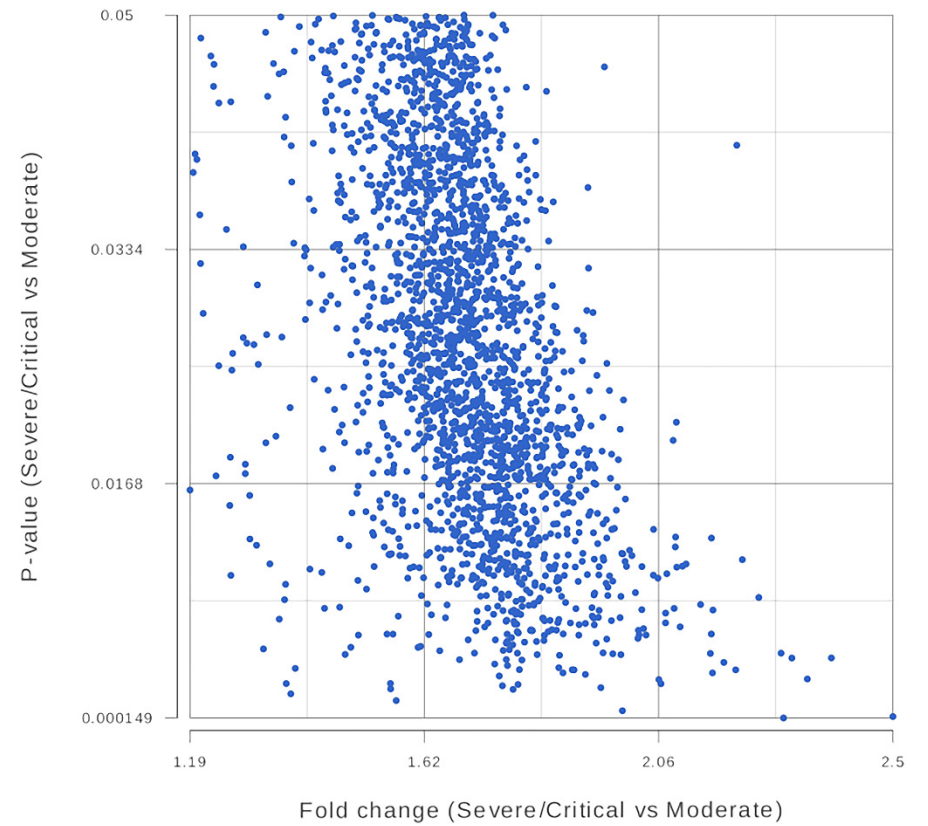

**Figure S4.** (A,B) Down- (left) and upregulated (right) genes comparing severe vs moderate patients from dataset GSE162835.

**A)**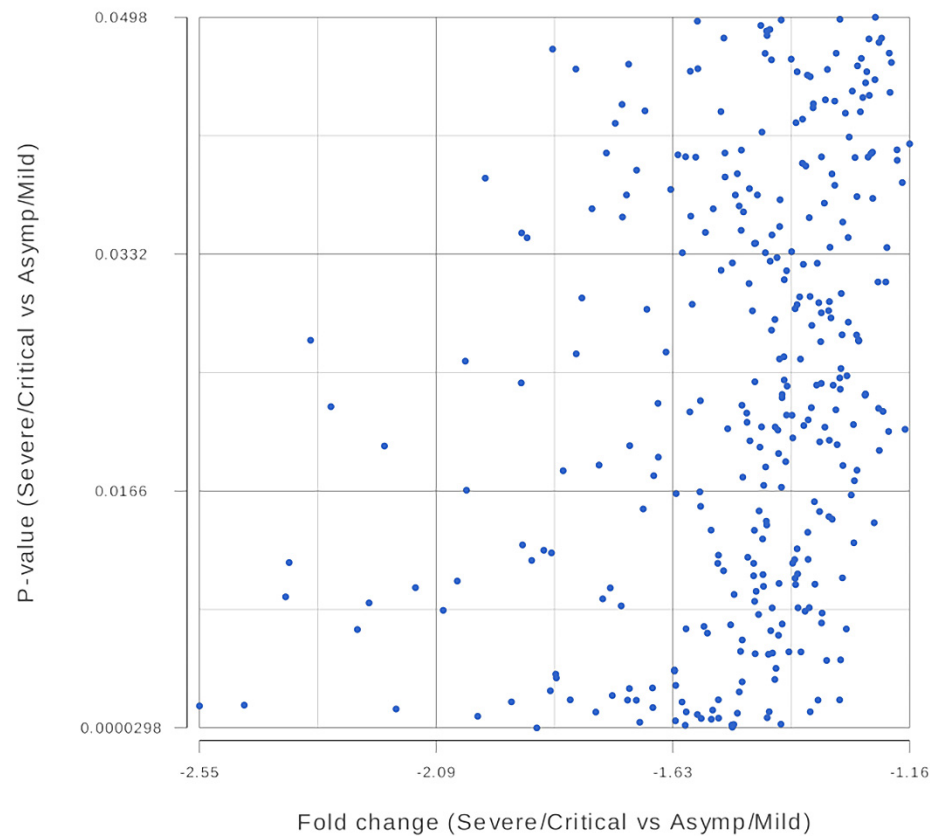**B)**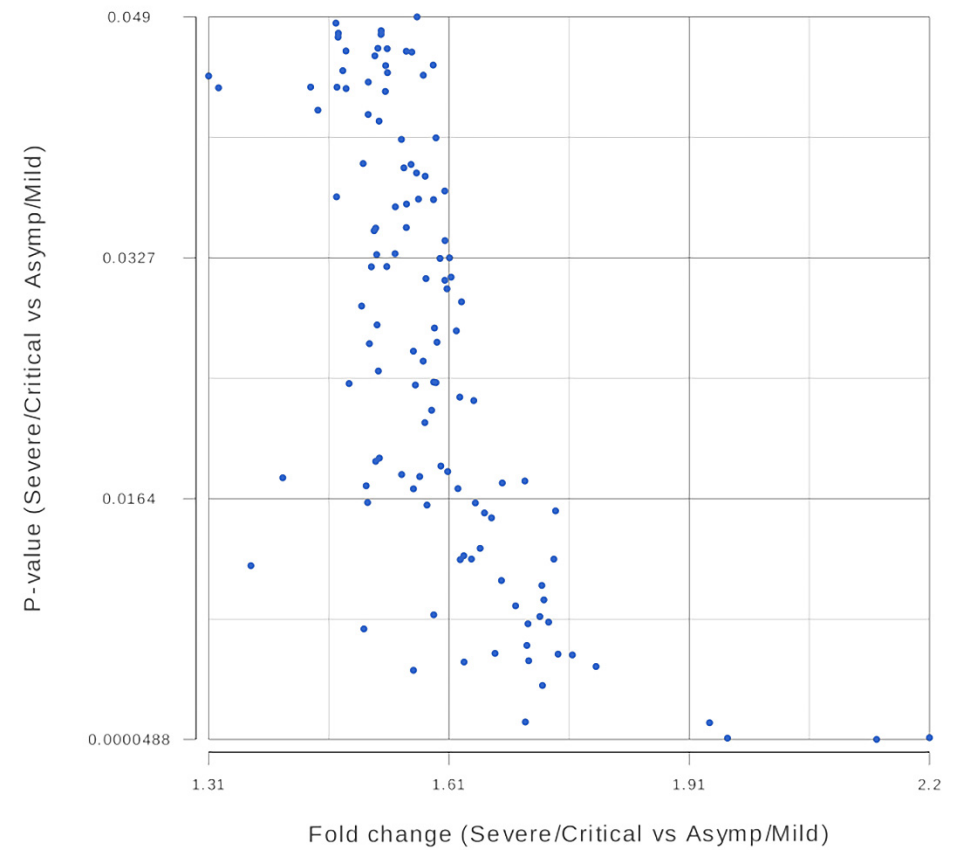

**Figures S5. (A,B)** Down- (left) and upregulated (right) genes comparing severe vs mild patients from dataset GSE162835.

**A)**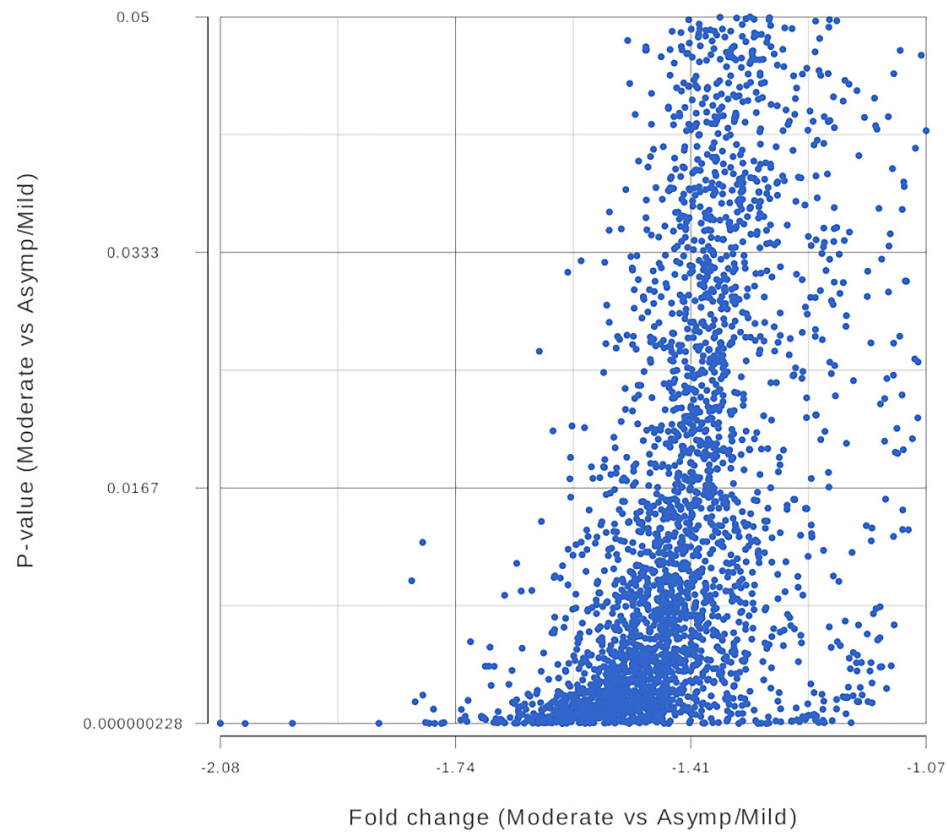**B)**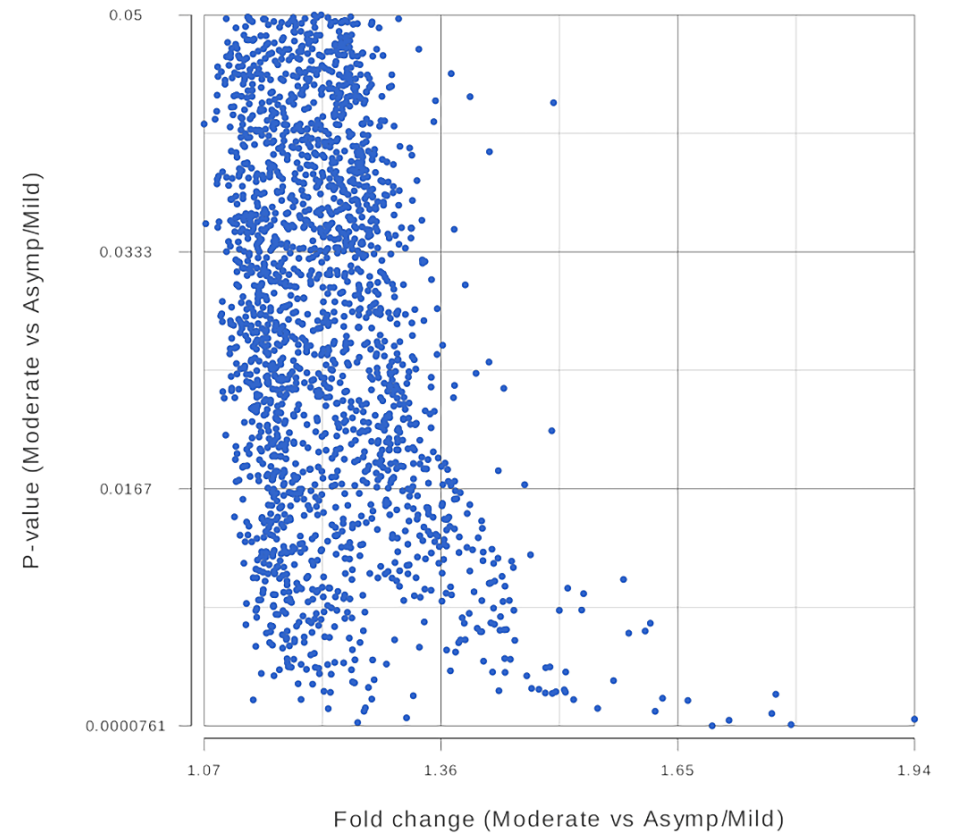

**Figures S6. (A,B)** Down- (left) and upregulated (right) genes comparing moderate vs mild patients from dataset GSE162835.

## Host-Virus Interactions - Heart

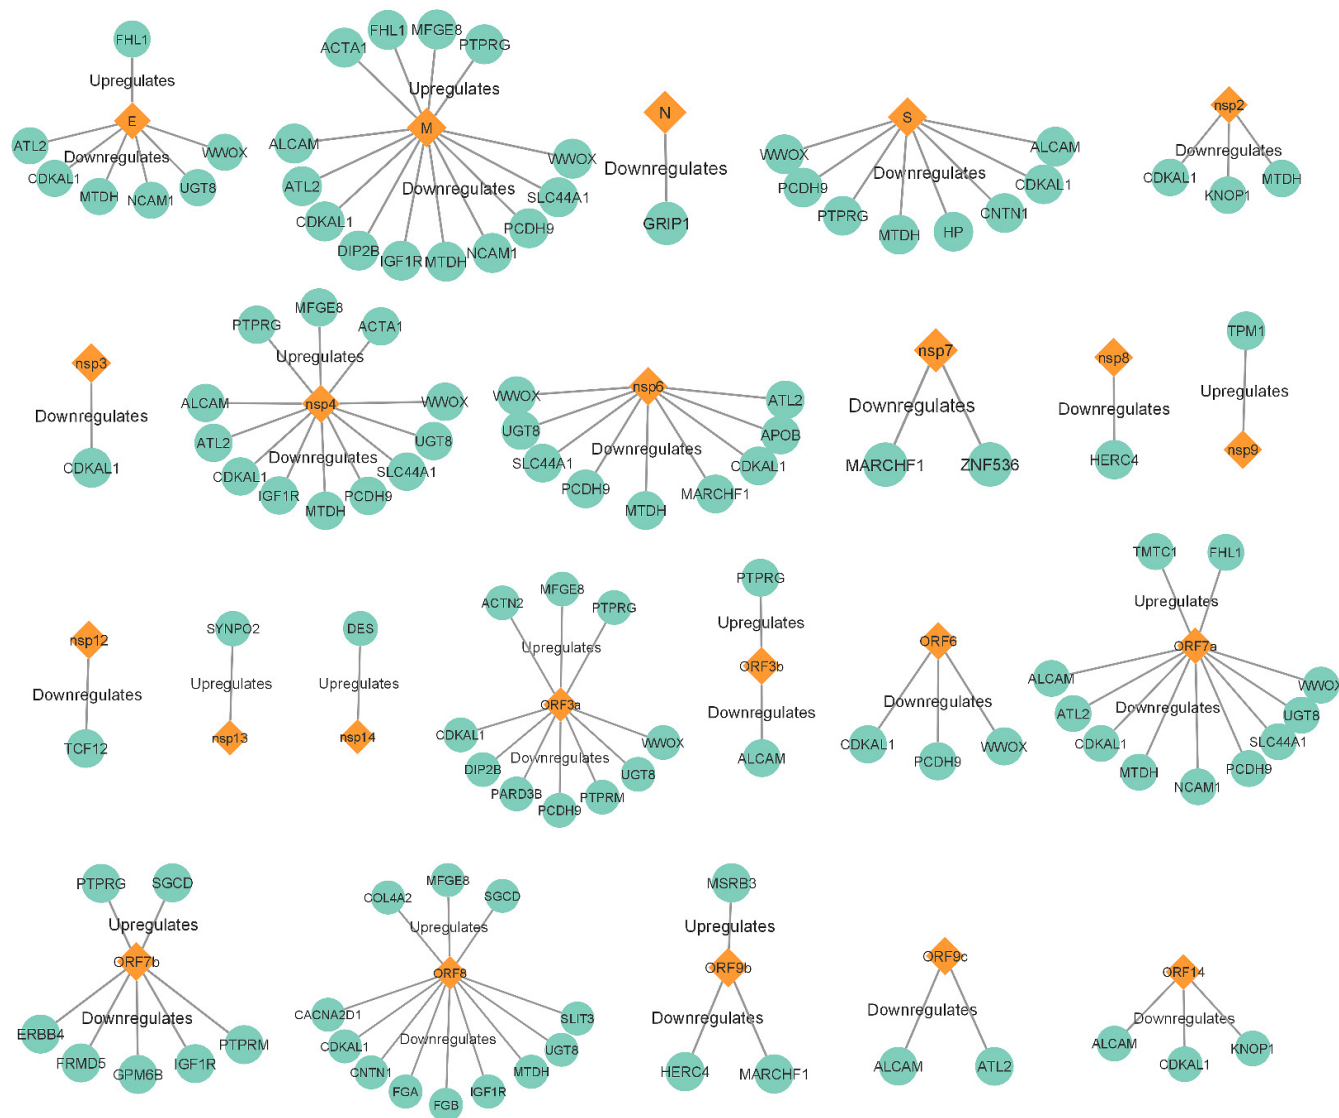

**Figure S7.** Viral-host protein mapping for heart samples. Interactions between SARS-CoV-2 proteins (orange diamonds) and human proteins (green circles). Interactions (black lines) were determined via comparison to BIOGRID's interaction database and were sorted by down- or upregulation of host proteins.



# Host-Virus Interactions - Kidney

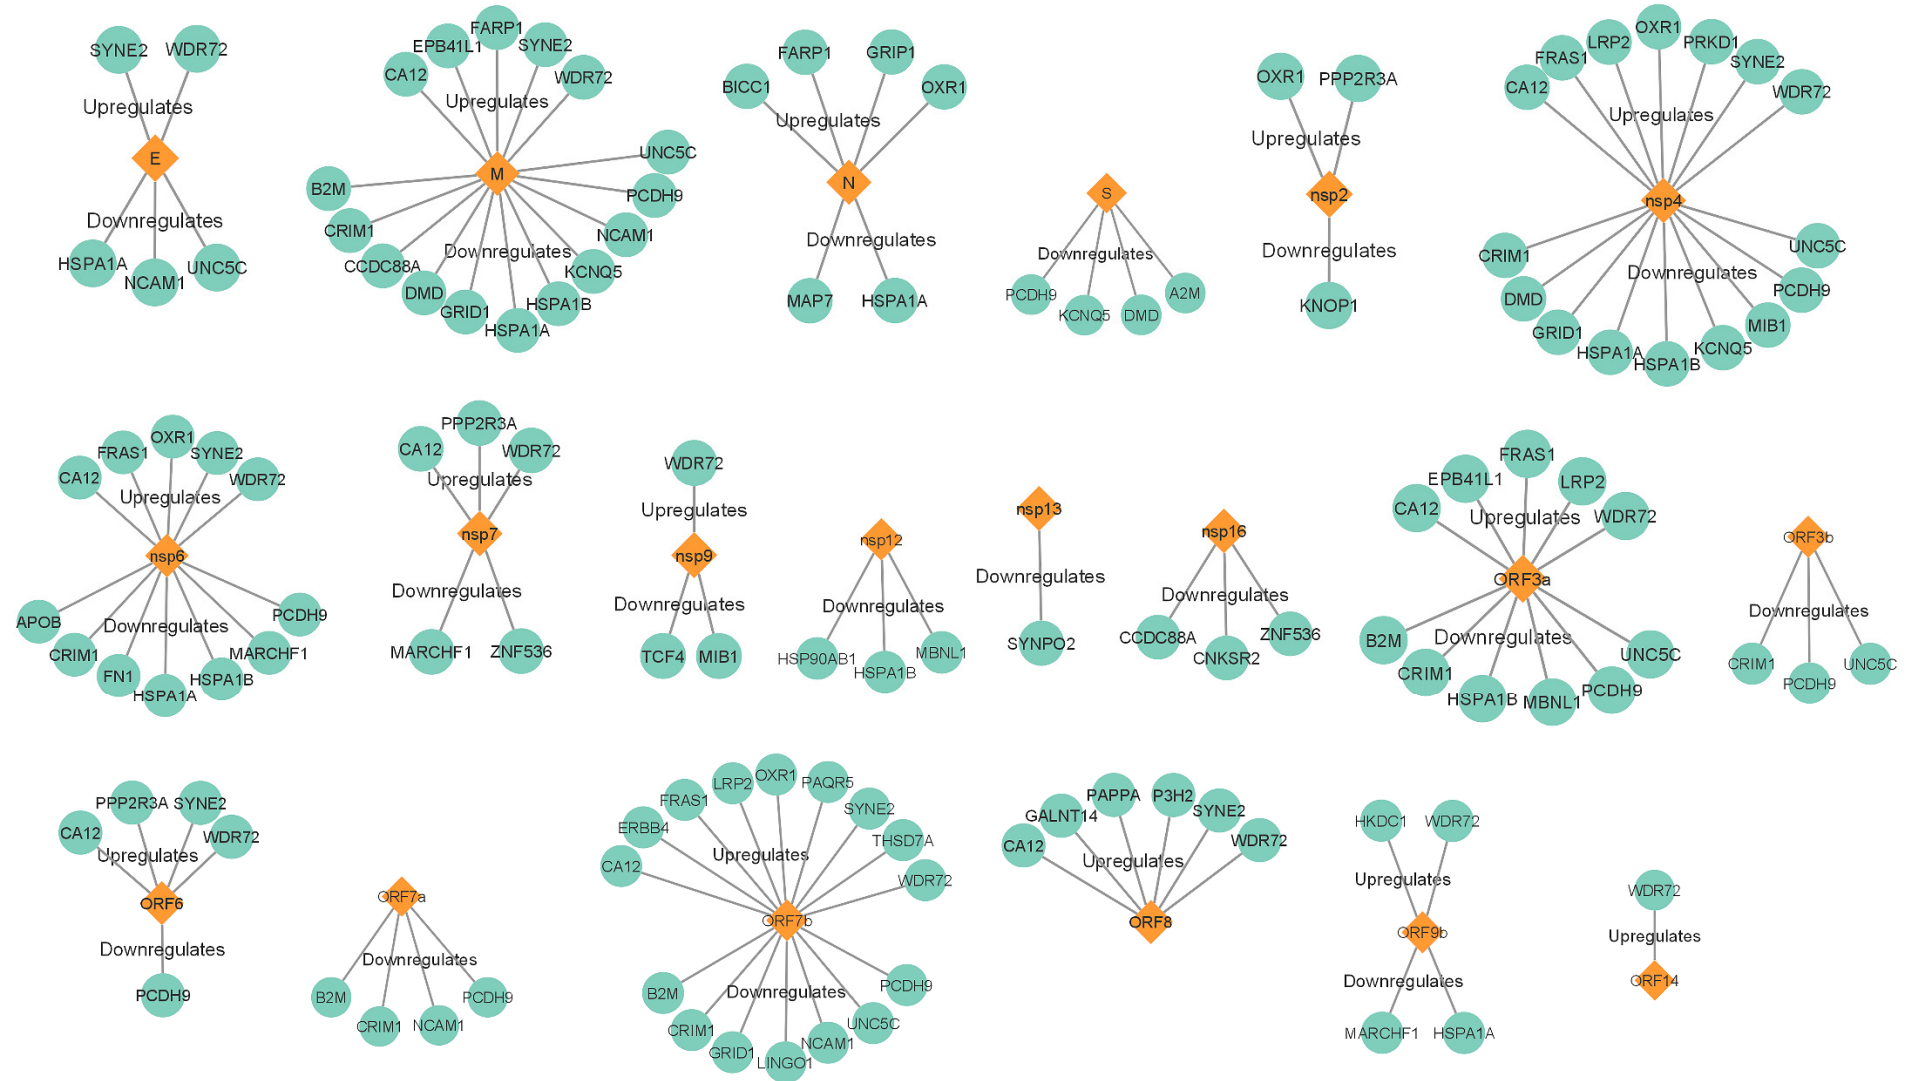

**Figure S8.** Viral-host protein mapping for kidney samples. Interactions between SARS-CoV-2 proteins (orange diamonds) and human proteins (green circles). Interactions (black lines) were determined via comparison to BIOGRID's interaction database and were sorted by down- or upregulation of host proteins.



## Host-Viral Interactions - Liver

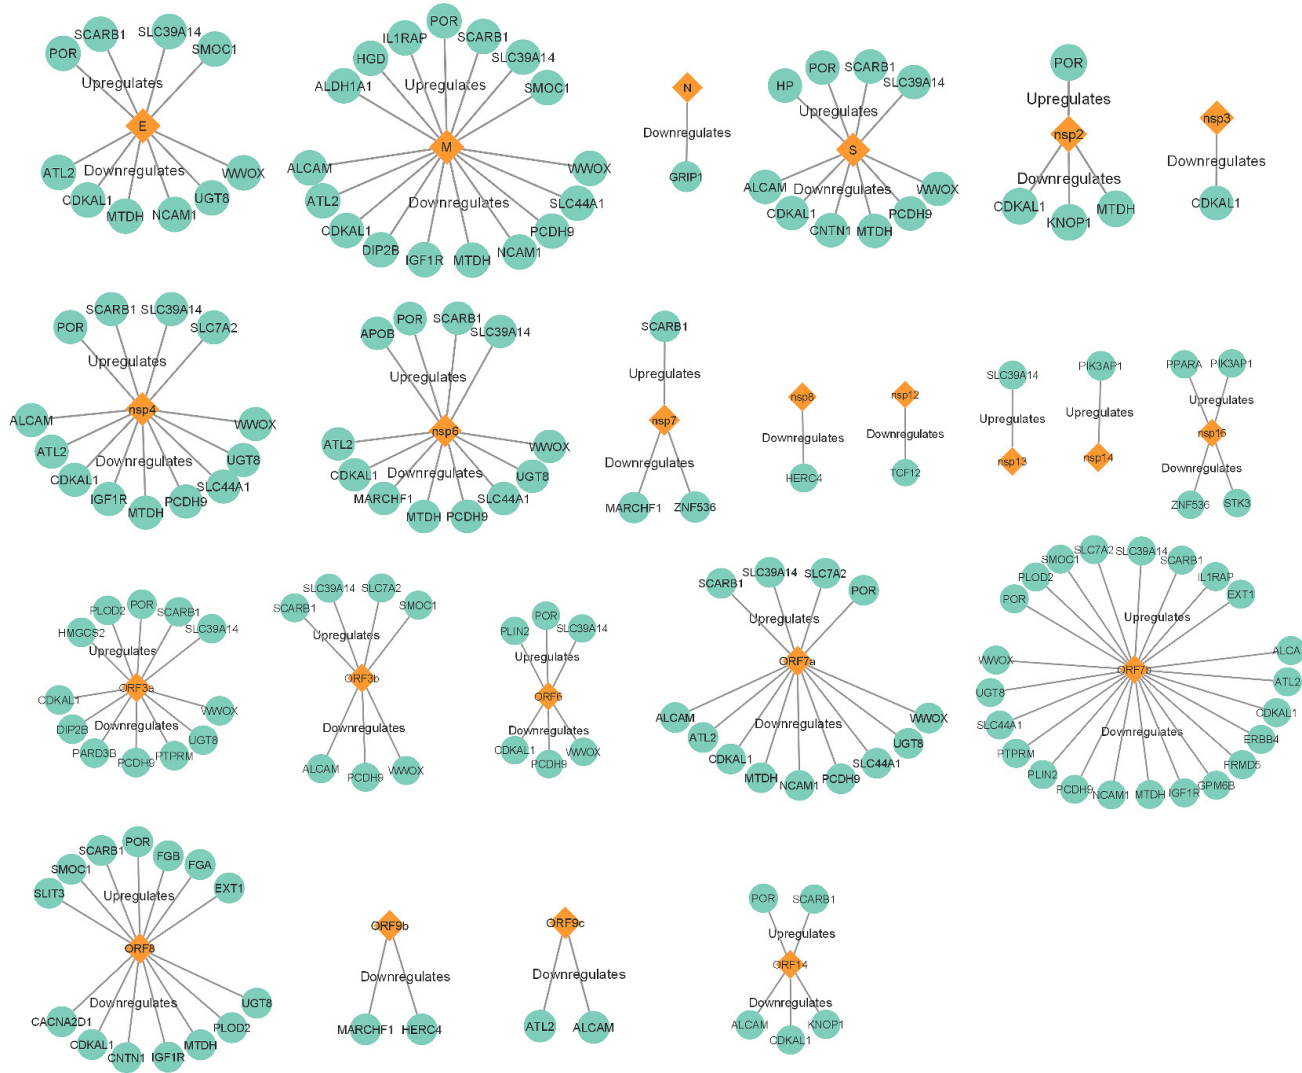

**Figure S9.** Viral-host protein mapping for liver samples. Interactions between SARS-CoV-2 proteins (orange diamonds) and human proteins (green circles). Interactions (black lines) were determined via comparison to BIOGRID's interaction database and were sorted by down- or upregulation of host proteins.

# Host-Viral Interactions - Lung

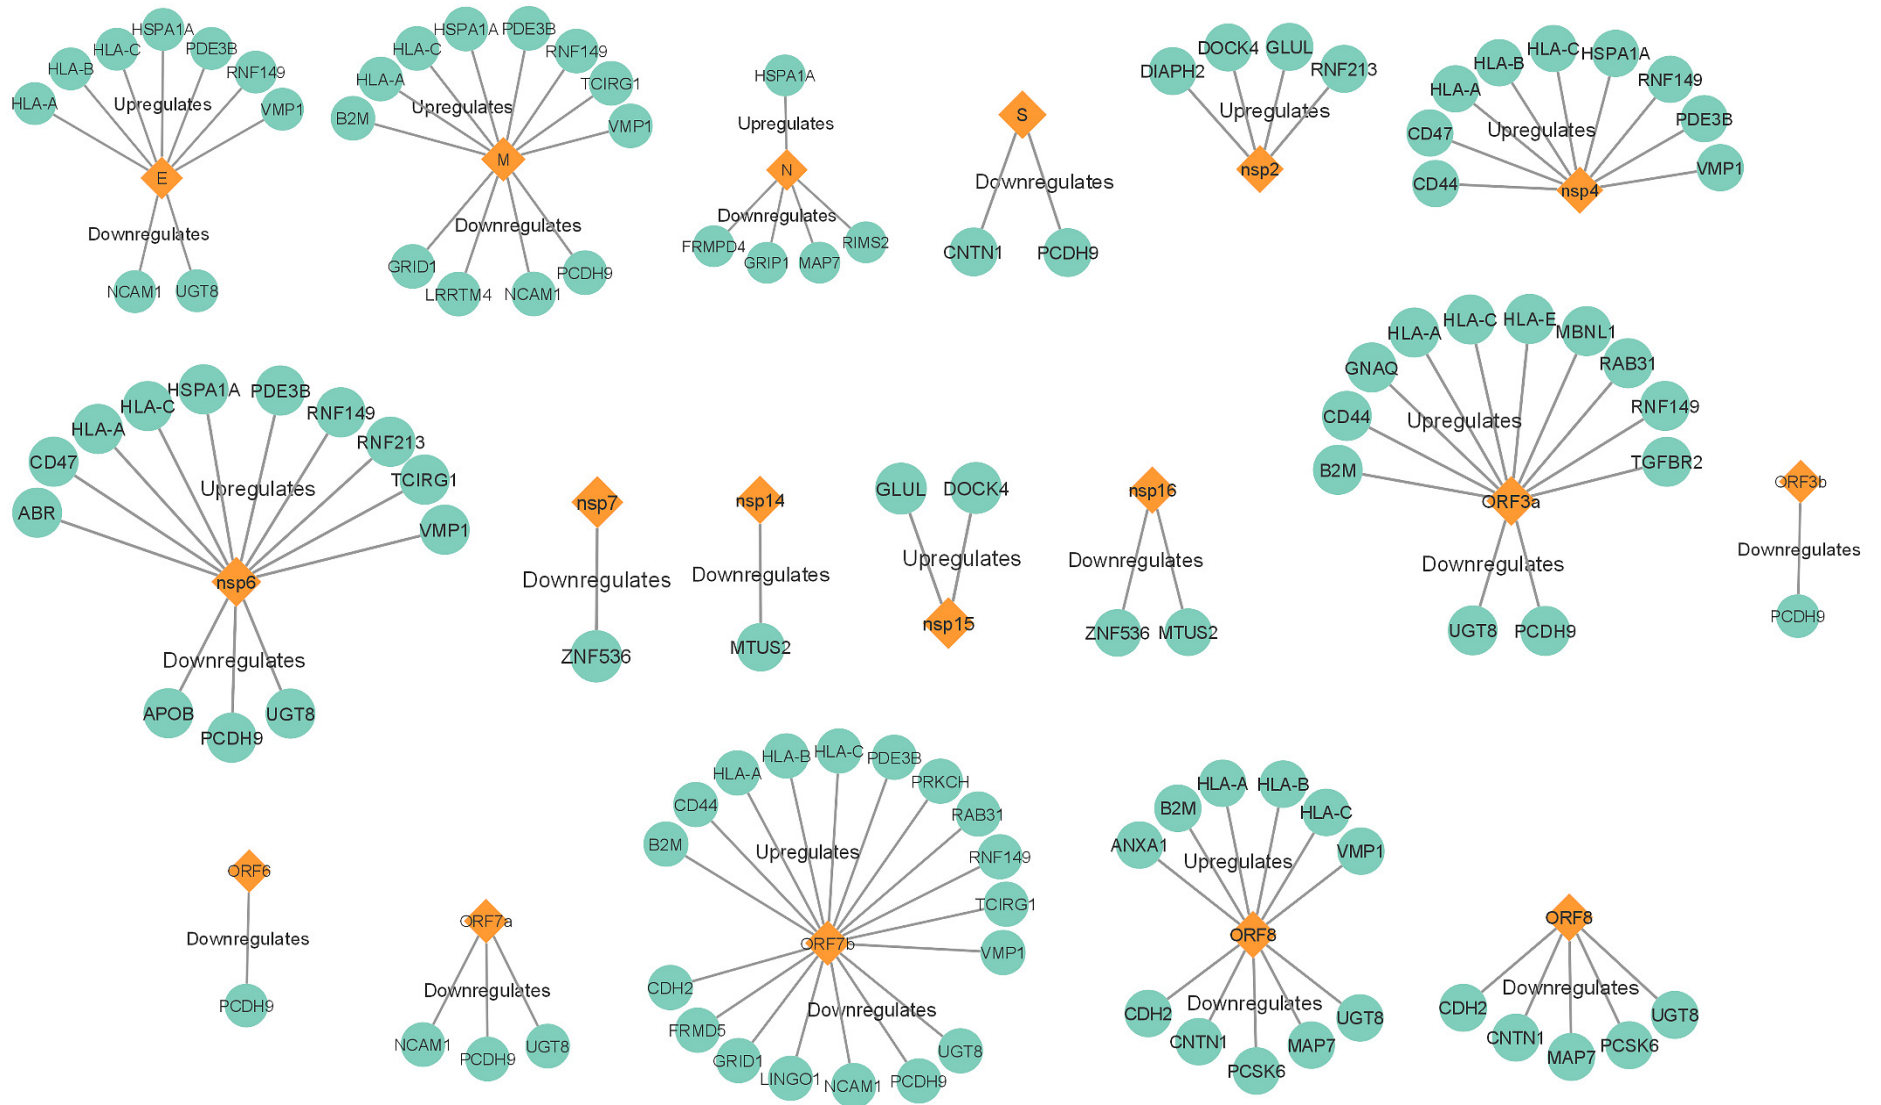

**Figure S10.** Viral-host protein mapping for lung samples. Interactions between SARS-CoV-2 proteins (orange diamonds) and human proteins (green circles). Interactions (black lines) were determined via comparison to BIOGRID's interaction database and were sorted by down- or upregulation of host proteins.
